# Supplementary material
Source: MDPI journal article supplement (https://www.mdpi.com/2077-1312/11/3/677)
Supplement: s1 [file s1]

# Supplementary file for the paper “Underwater target detection based on improved YOLOv7”

Kaiyue Liu, Qi Sun, Daming Sun, Lin Peng,<sup>\*</sup>, Mengduo Yang,<sup>\*</sup> and Nizhuan<sup>\*</sup>

**Table S1.** Performance comparison of target detection models based on 5-fold cross-validation of the URPC dataset.

| Method              | Precision(mean±std) | Recall(mean±std) | mAP@0.5(mean±std) | mAP@0.95(mean±std) |
|---------------------|---------------------|------------------|-------------------|--------------------|
| EfficientDet-d0[52] | 83.4%±0.04          | 72.3%±0.05       | 80.6%±0.05        | 43.2%±0.02         |
| SSD[21]             | 77.9%±0.07          | 73.4%±0.04       | 76.2%±0.08        | 37.1%±0.03         |
| RetinaNet-50[53]    | 73.1%±0.01          | 66.6%±0.03       | 73.5%±0.05        | 34.6%±0.01         |
| Detr[54]            | 83.9%±0.08          | 78.8%±0.01       | 85.4%±0.07        | 45.6%±0.03         |
| YOLOv5s[27]         | 87.6%±0.03          | 79.7%±0.03       | 84.1%±0.04        | 48.9%±0.02         |
| YOLOv6n[28]         | 87.1%±0.02          | 77.8%±0.03       | 83.0%±0.08        | 50.6%±0.02         |
| YOLOv7[29]          | 86.4%±0.01          | 81.2%±0.05       | 86.5%±0.04        | 51.9%±0.03         |
| YOLOv7-AC           | 90.3%±0.04          | 84.0%±0.01       | 89.8%±0.03        | 54.0%±0.02         |

**Table S2.** Ablation comparison of model performance improvement based on 5-fold cross-validation of the URPC dataset.

| Model  | ResNet-ACmix | AC-E-ELAN | GAM | K-means++ | AP(echinus)(mean±std) | AP(starfish)(mean±std) | AP(scallop)(mean±std) | AP(holothuria n)(mean±std) | mAP(mean±std) |
|--------|--------------|-----------|-----|-----------|-----------------------|------------------------|-----------------------|----------------------------|---------------|
| YOLOv7 | ×            | ×         | ×   | ×         | 78.4%±0.05            | 89.5%±0.03             | 90.7%±0.03            | 87.7%±0.02                 | 86.5%±0.04    |
|        | √            | ×         | ×   | ×         | 87.5%±0.01            | 90.5%±0.03             | 87.6%±0.02            | 84.4%±0.02                 | 87.5%±0.01    |
|        | √            | √         | ×   | ×         | 91.5%±0.01            | 89.7%±0.01             | 91.8%±0.03            | 83.4%±0.02                 | 89.1%±0.02    |
|        | √            | √         | √   | ×         | 91.6%±0.03            | 91.4%±0.01             | 90.2%±0.01            | 84.8%±0.01                 | 89.5%±0.01    |
|        | √            | √         | √   | √         | 92.4%±0.04            | 91.1%±0.02             | 92.0%±0.03            | 83.7%±0.02                 | 89.8%±0.03    |

**Table S3.** Performance comparison of target detection models based on 5-fold cross-validation of the Brackish dataset.

| Method              | Precision(mean±std) | Recall(mean±std) | mAP@0.5(mean±std) | mAP@0.95(mean±std) |
|---------------------|---------------------|------------------|-------------------|--------------------|
| EfficientDet-d0[52] | 94.6%±0.06          | 87.3%±0.05       | 93.0%±0.08        | 62.2%±0.07         |
| SSD[21]             | 84.3%±0.09          | 87.4%±0.05       | 88.2%±0.11        | 54.8%±0.08         |
| RetinaNet-50[53]    | 87.1%±0.10          | 77.9%±0.08       | 84.7%±0.12        | 51.3%±0.06         |
| Detr[54]            | 96.8%±0.04          | 92.7%±0.06       | 95.7%±0.07        | 72.7%±0.05         |
| YOLOv5s[27]         | 96.1%±0.05          | 92.8%±0.03       | 95.4%±0.09        | 72.1%±0.06         |
| YOLOv6[28]          | 96.4%±0.06          | 91.4%±0.12       | 94.5%±0.14        | 71.2%±0.08         |
| YOLOv7[29]          | 95.4%±0.03          | 93.1%±0.05       | 95.2%±0.08        | 74.5%±0.04         |
| YOLOv7-AC           | 98.8%±0.04          | 94.5%±0.06       | 96.4%±0.06        | 74.2%±0.04         |

**Table S4.** Ablation comparison of model performance improvement based on 5-fold cross-validation of the Brackish dataset.

| Model  | ResNet-ACmix | AC-E-ELAN | GAM | K-means++ | AP(fish)(mean±std) | AP(small_fish)(mean±std) | AP(crab)(mean±std) | AP(shrimp)(mean±std) | AP(jellyfish)(mean±std) | AP(starfish)(mean±std) | mAP(mean±std) |
|--------|--------------|-----------|-----|-----------|--------------------|--------------------------|--------------------|----------------------|-------------------------|------------------------|---------------|
| YOLOv7 | ×            | ×         | ×   | ×         | 94.5%±0.04         | 92.4%±0.04               | 98.7%±0.02         | 91.3%±0.04           | 94.2%±0.03              | 99.5%±0.03             | 95.2%±0.08    |
|        | √            | ×         | ×   | ×         | 97.0%±0.03         | 93.0%±0.04               | 98.8%±0.02         | 91.3%±0.03           | 92.9%±0.02              | 99.5%±0.01             | 95.5%±0.05    |
|        | √            | √         | ×   | ×         | 97.3%±0.02         | 94.7%±0.03               | 98.9%±0.04         | 91.4%±0.01           | 94.7%±0.03              | 99.6%±0.03             | 96.1%±0.04    |
|        | √            | √         | √   | ×         | 97.8%±0.02         | 93.6%±0.04               | 99.2%±0.03         | 91.6%±0.03           | 95.4%±0.03              | 99.6%±0.02             | 96.2%±0.05    |
|        | √            | √         | √   | √         | 98.2%±0.03         | 93.7%±0.04               | 99.3%±0.02         | 92.0%±0.0            | 95.6%±0.03              | 99.6%±0.02             | 96.4%±0.06    |
